# Supplementary material for: Novel procedure of CO2 capture of the CaO sorbent activator on the reaction of one-part alkali-activated slag
Source: Royal Society of Chemistry journal article supplement (doi:10.1039/d1ra01353j), 2021-01-01
Supplement: d1ra01353j1.pdf [file d1ra01353j1.pdf]

**Table. 1.** Mix proportions for AAS paste

|         | Slag | H <sub>2</sub> O | Na <sub>2</sub> CO <sub>3</sub> | sorbent |
|---------|------|------------------|---------------------------------|---------|
| CN 0 H  | 100  | 44               | 6.8                             | 3.60    |
| CN 1 H  | 100  | 44               | 6.8                             | 4.00    |
| CN 6 H  | 100  | 44               | 6.8                             | 4.26    |
| CN 12 H | 100  | 44               | 6.8                             | 4.71    |
| CN 24 H | 100  | 44               | 6.8                             | 4.80    |
| CN 72 H | 100  | 44               | 6.8                             | 5.49    |

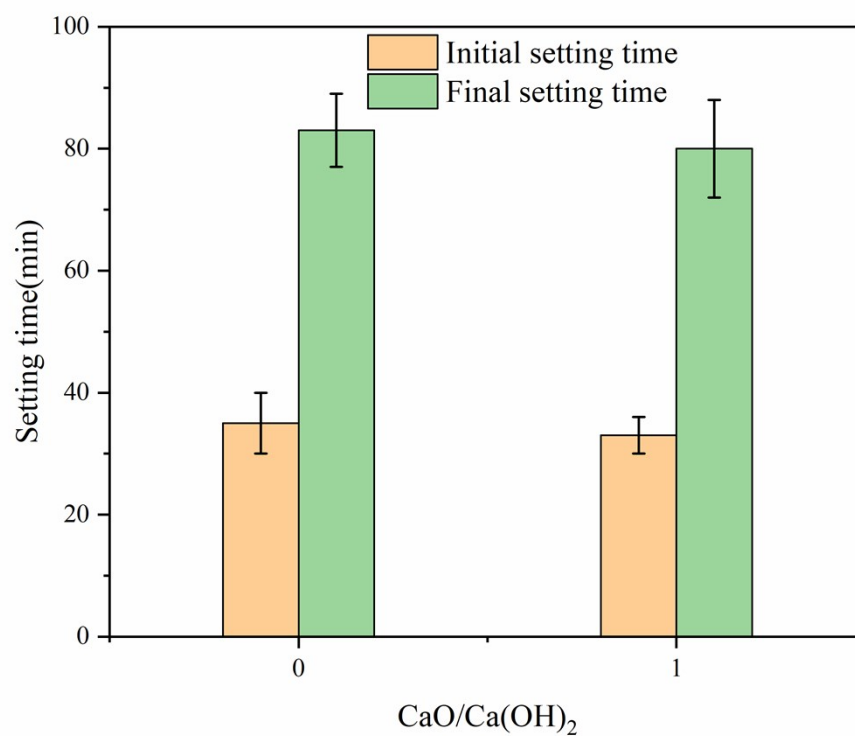

**Figure.s.1** The setting time of the AAS paste activated by the pure CaO/Ca(OH)<sub>2</sub>.

**Figure.s.1** shows that the conversion of calcium oxide to calcium hydroxide has negligible effect on the setting time of the AAS paste.

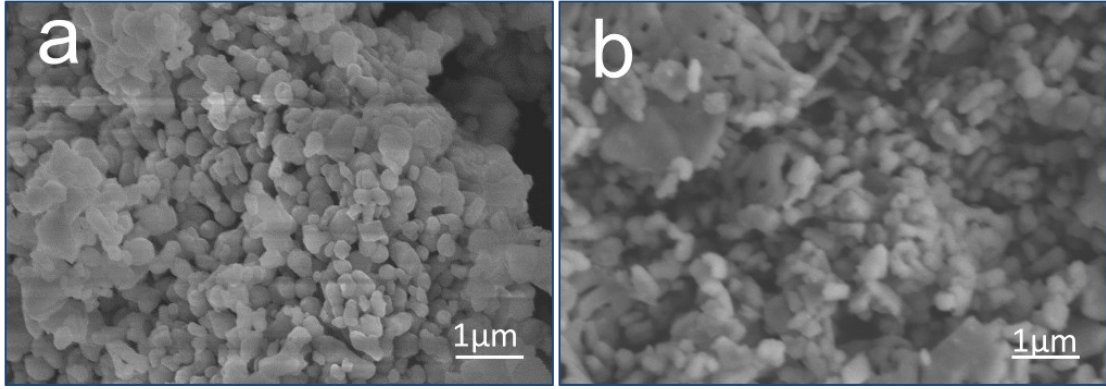

**Figure.s.2** SEM image of different kinds of CaO for a (analytical grade CaO), b  
(calcined limestone)

**Figure.s.2** shows different kinds of calcined CaCO<sub>3</sub> particle possesses a similar structure.
